# Supplementary material for: Ru dopants induced tensile strain in Ni2P for efficient urea-assisted water decomposition at an ampere-level current density
Source: Royal Society of Chemistry journal article supplement (doi:10.1039/d3ta07844b), 2024-01-01
Supplement: d3ta07844b1.pdf [file d3ta07844b1.pdf]

## Supporting Information

### **Ru dopants induced tensile strain in Ni<sub>2</sub>P for efficient urea-assisted water decomposition at an ampere-level current density**

Mengmeng Wang<sup>a,b</sup>, Yunmei Du<sup>a,b,\*</sup>, Shuangshuang Li<sup>a,b</sup>, Yuanxiang Gu<sup>b</sup> and Lei Wang<sup>a,c,\*</sup>

<sup>a</sup> Key Laboratory of Eco-chemical Engineering, Ministry of Education, International Science and Technology Cooperation Base of Eco-chemical Engineering and Green Manufacturing, Qingdao University of Science and Technology, Qingdao 266042, P. R. China.

<sup>b</sup> Shandong Engineering Research Center for Marine Environment Corrosion and Safety Protection, College of Environment and Safety Engineering, Qingdao University of Science and Technology, Qingdao 266042, P. R. China.

<sup>c</sup> College of Chemistry and Molecular Engineering, Qingdao University of Science and Technology, Qingdao 266042, China.

\*E-mail: duyunmeiqust@163.com (Yunmei Du); inorchemwl@126.com (Lei Wang)

## Figures and Tables

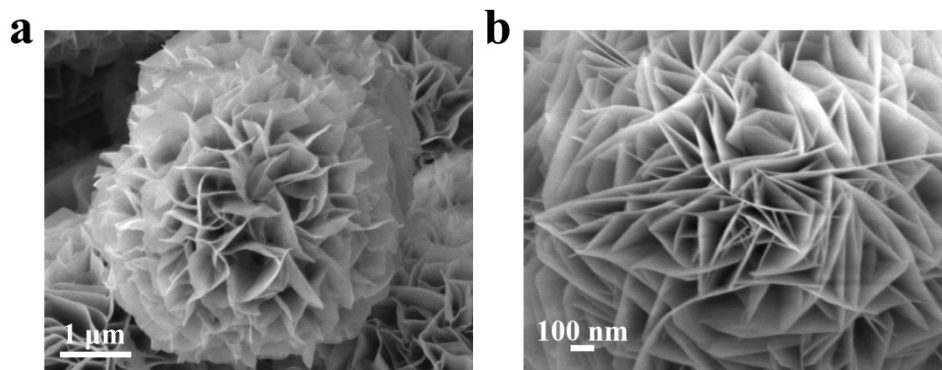

**Figure S1.** SEM image of N-Ni(OH)<sub>2</sub>.

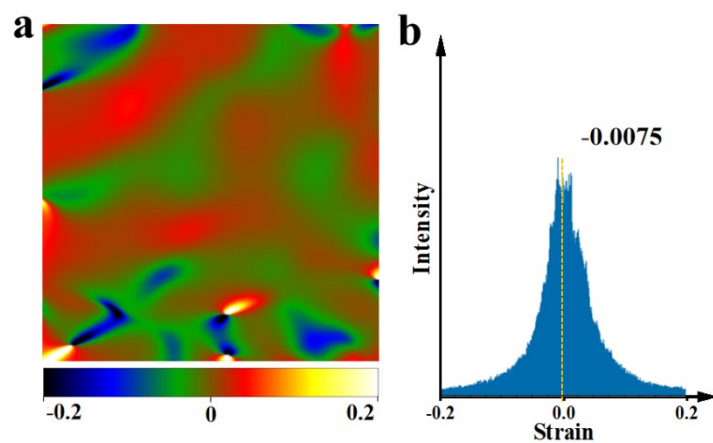

**Figure S2.** a) The exy strain component using geometric phase analysis (GPA) algorithm, and b) histogram of strain distribution of Ru-Ni<sub>2</sub>P@CN.

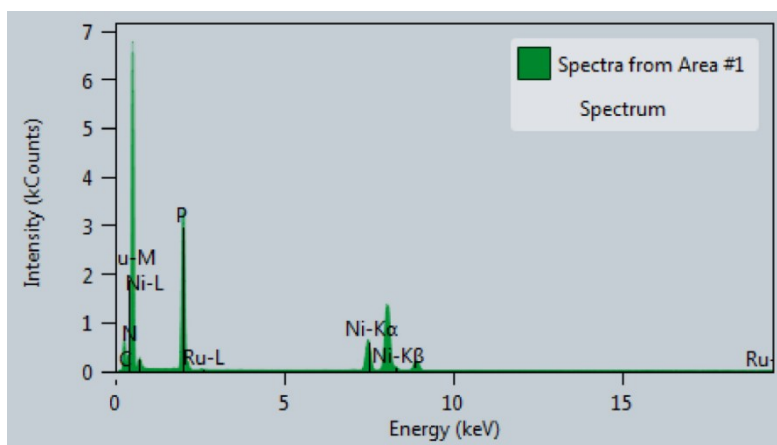

**Figure S3.** EDX of Ru-Ni<sub>2</sub>P@CN catalyst.

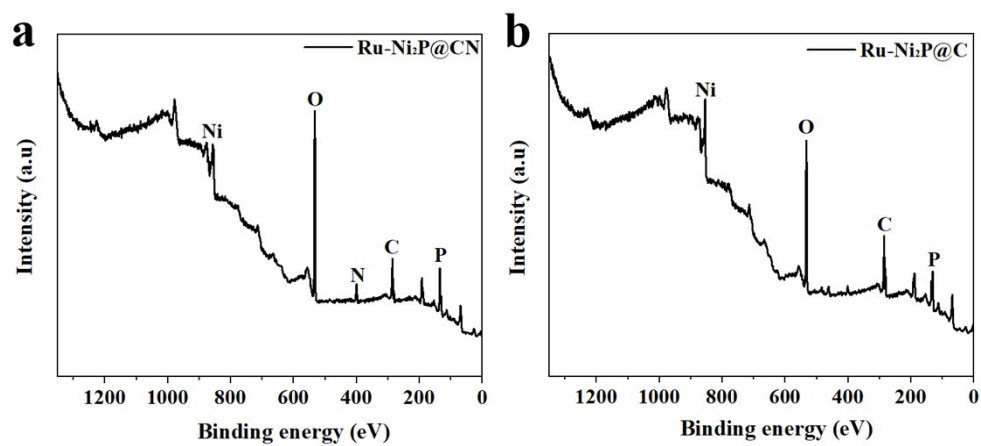

**Figure S4.** XPS measured the spectra of Ru-Ni<sub>2</sub>P@CN and Ru-Ni<sub>2</sub>P@C.

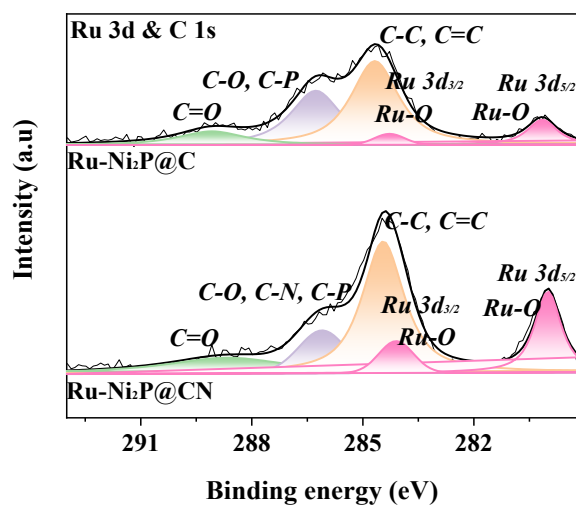

**Figure S5.** XPS measured the spectra of Ru-Ni<sub>2</sub>P@CN and Ru-Ni<sub>2</sub>P@C.

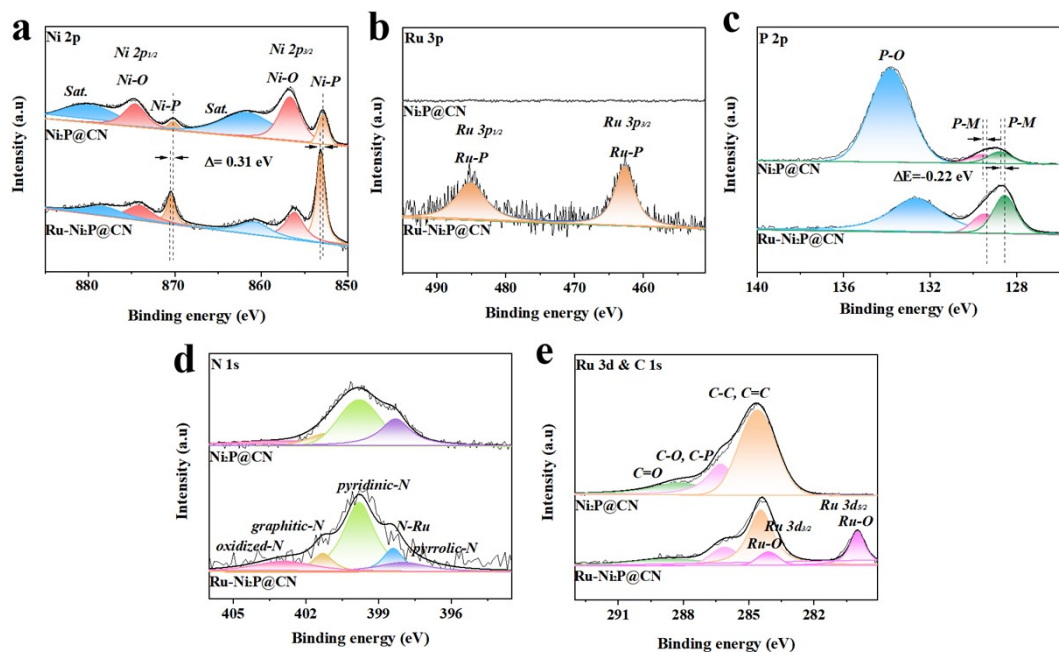

**Figure S6.** High-resolution spectra of (a) Ni 2p. (b) Ru 3p. (c) P 2p. (d) N 1s. (e) Ru 3d & C 1s.

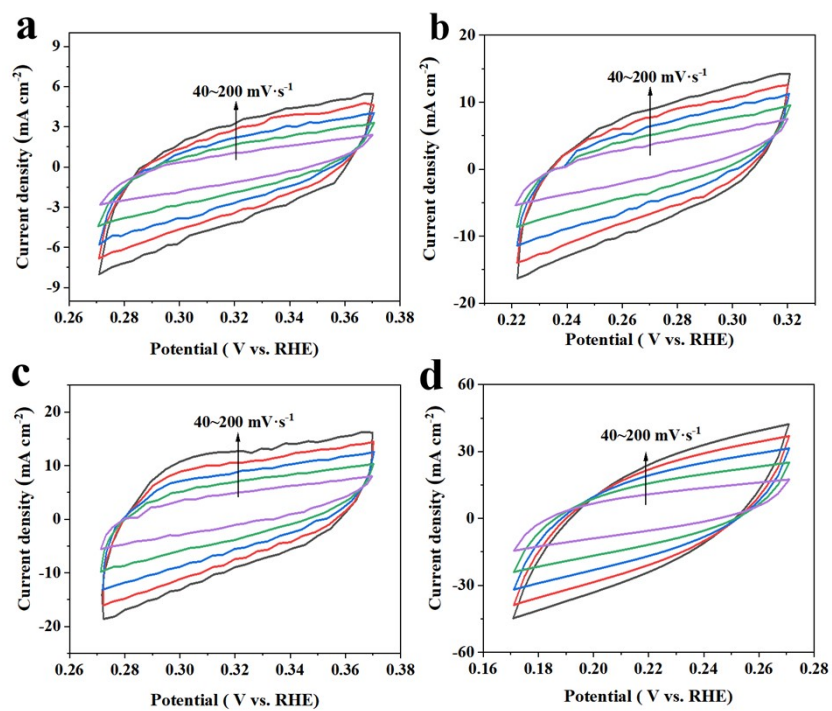

**Figure S7.** a) CV curves of the non-faradic region for Ni<sub>2</sub>P@CN, (b) Ru-Ni<sub>2</sub>P, (c) Ru-Ni<sub>2</sub>P@CN and (d) Ru-Ni<sub>2</sub>P@C.



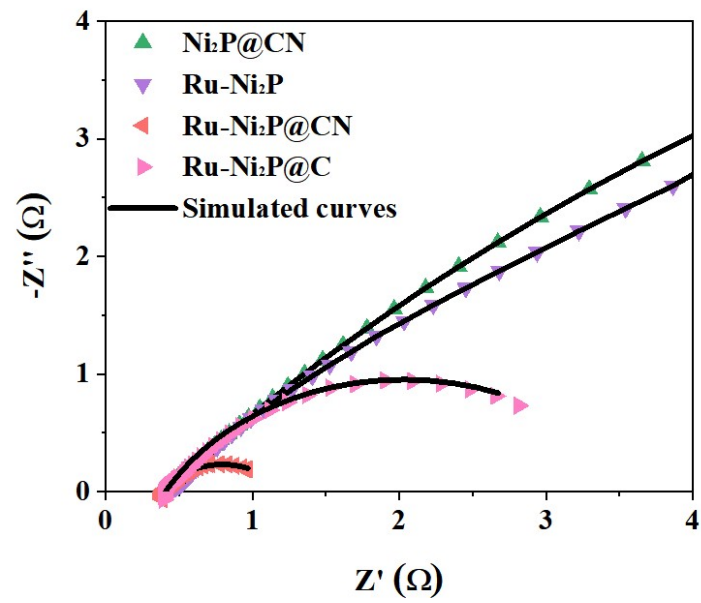

**Figure S8.** Nyquist and Bode plots for Ni<sub>2</sub>P@CN, Ru-Ni<sub>2</sub>P, Ru-Ni<sub>2</sub>P@CN and Ru-Ni<sub>2</sub>P@C in 1.0 M KOH.

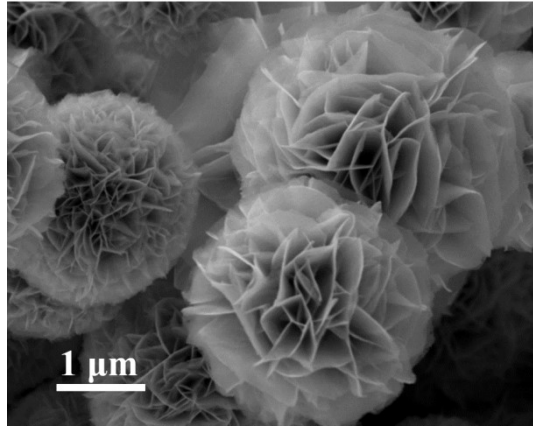

**Figure S9.** SEM of Ru-Ni<sub>2</sub>P@CN after HER.

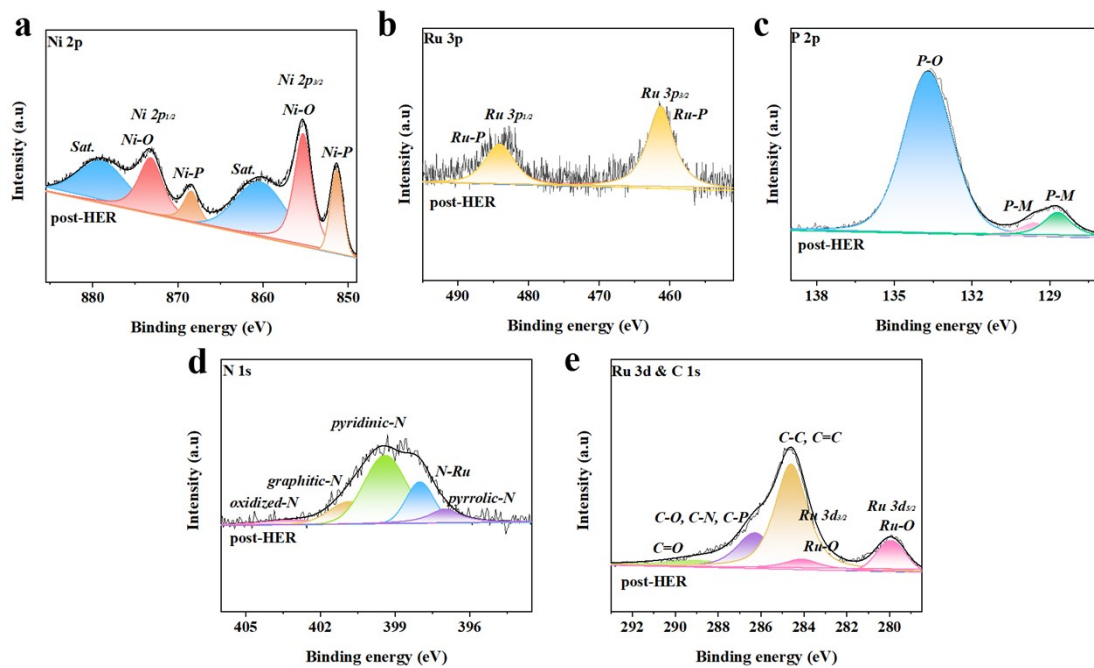

**Figure S10.** XPS spectra of the Ru-Ni<sub>2</sub>P@CN after HER stability test: (a) Ni 2p, (b) Ru 3p, (c) P 2p, (d) N 1s, and (e) Ru 3d & C 1s spectrum.

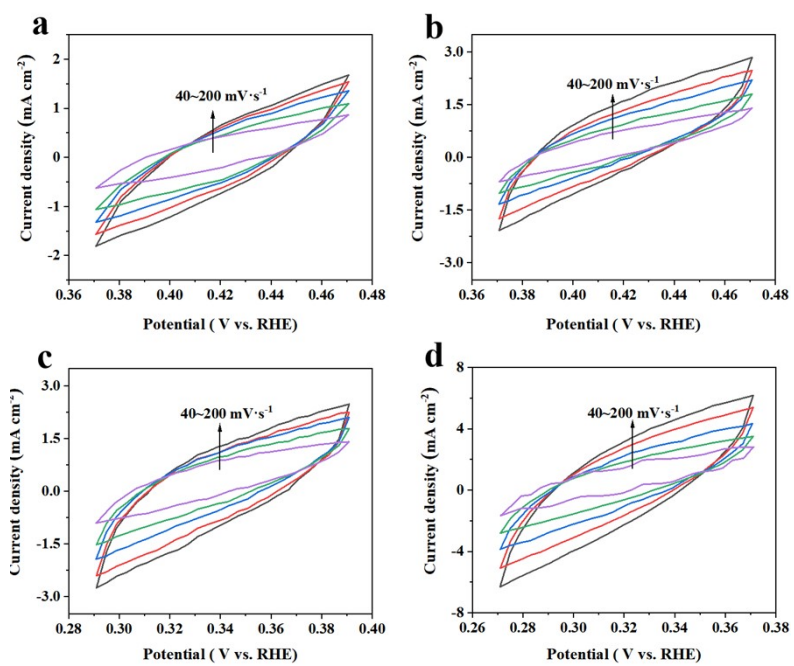

**Figure S11.** a) CV curves of the non-faradic region for Ni<sub>2</sub>P@CN, (b) Ru-Ni<sub>2</sub>P, (c) Ru-Ni<sub>2</sub>P@CN and (d) Ru-Ni<sub>2</sub>P@C

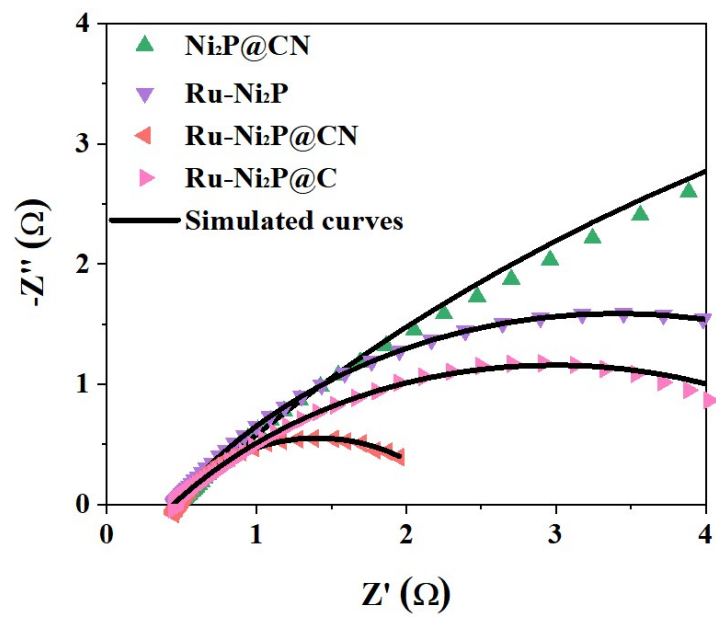

**Figure S12.** Nyquist and Bode plots for Ni<sub>2</sub>P@CN, Ru-Ni<sub>2</sub>P, Ru-Ni<sub>2</sub>P@CN and Ru-Ni<sub>2</sub>P@C in 1.0 M KOH and 0.5 M urea.

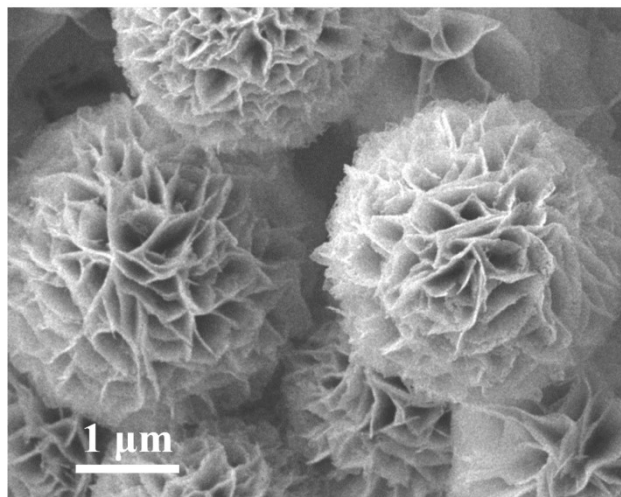

**Figure S13.** SEM of Ru-Ni<sub>2</sub>P@CN after UOR.

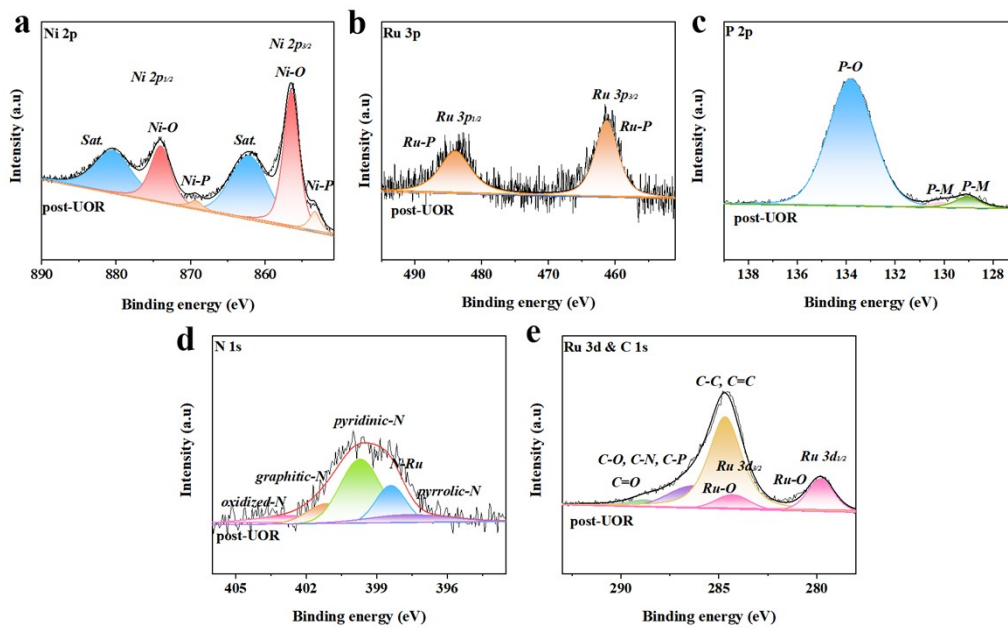

**Figure S14.** XPS spectra of the Ru-Ni<sub>2</sub>P@CN after UOR stability test: (a) Ni 2p, (b) Ru 3p, (c) P 2p, (d) N 1s, and (e) Ru 3d & C 1s spectrum.

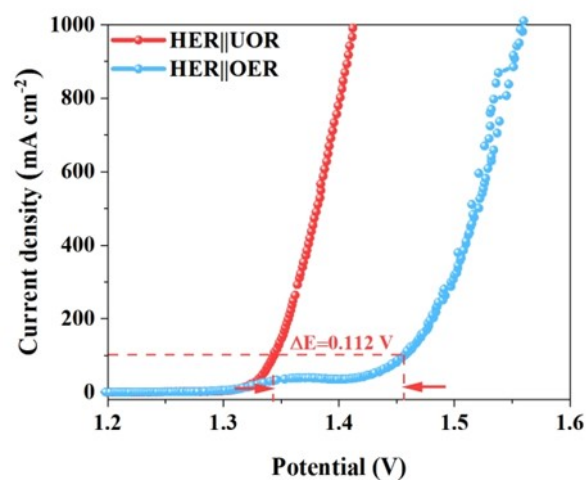

**Figure S15.** Electrocatalytic overall water splitting performance of Ru-Ni<sub>2</sub>P@CN||Ru-Ni<sub>2</sub>P@CN in 0.5 M urea solution was compared with that of Ru-Ni<sub>2</sub>P@CN||Ru-Ni<sub>2</sub>P@CN in 1.0 M KOH.



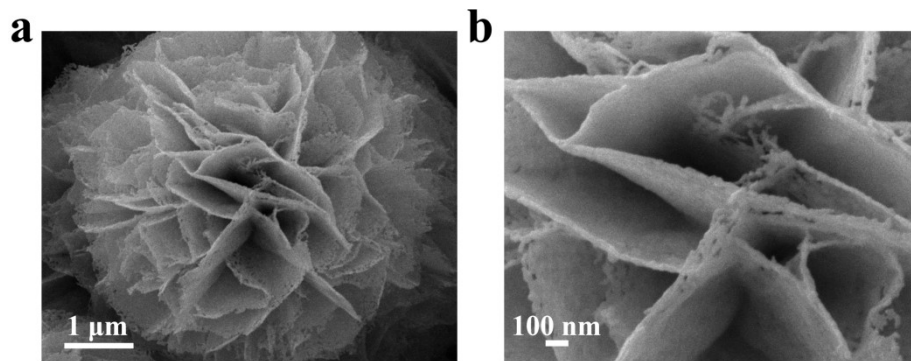

**Figure S16.** SEM image of Ru-Ni<sub>2</sub>P@CN-5.

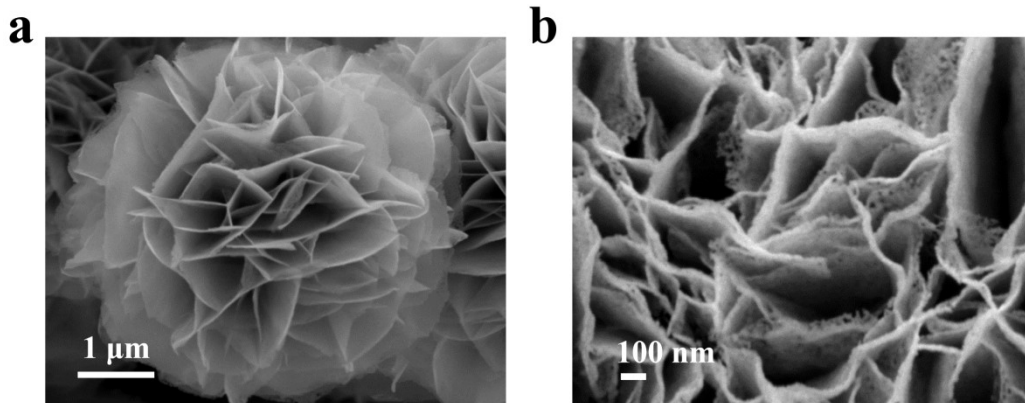

**Figure S17.** SEM image of Ru-Ni<sub>2</sub>P@CN-10.

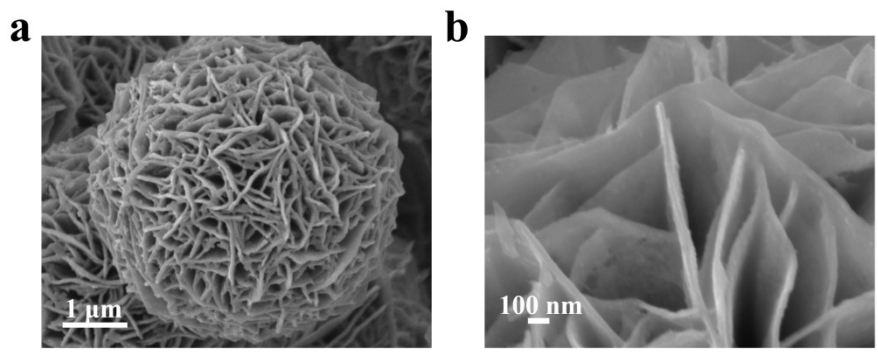

**Figure S18.** SEM image of Ru-Ni<sub>2</sub>P@CN-20.

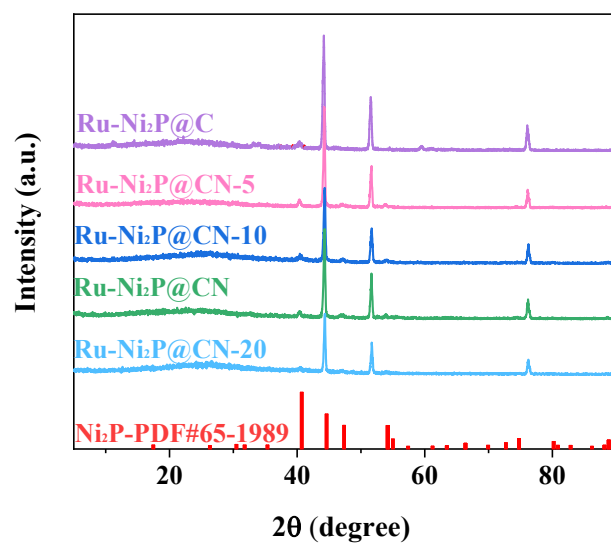

**Figure S19.** XRD patterns of Ru-Ni<sub>2</sub>P@C, Ru-Ni<sub>2</sub>P@CN-5, Ru-Ni<sub>2</sub>P@C-10, Ru-Ni<sub>2</sub>P@CN, and Ru-Ni<sub>2</sub>P@CN-20.

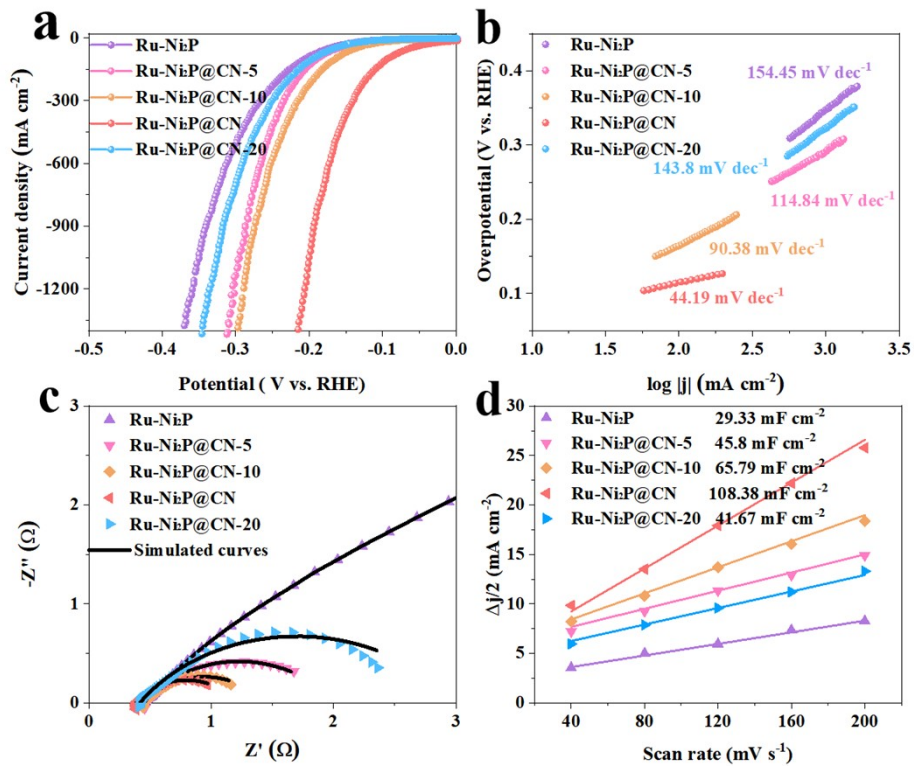

**Figure S20.** a) LSV curves of Ru-Ni<sub>2</sub>P, Ru-Ni<sub>2</sub>P@CN-5, Ru-Ni<sub>2</sub>P@CN-10, Ru-Ni<sub>2</sub>P@CN, and Ru-Ni<sub>2</sub>P@CN-20 in 1.0 M KOH. b) Tafel slopes. c) EIS charts d)  $C_{dl}$  plots of Ru-Ni<sub>2</sub>P@C, Ru-Ni<sub>2</sub>P@CN-5, Ru-Ni<sub>2</sub>P@CN-10, Ru-Ni<sub>2</sub>P@CN, and Ru-Ni<sub>2</sub>P@CN-20.

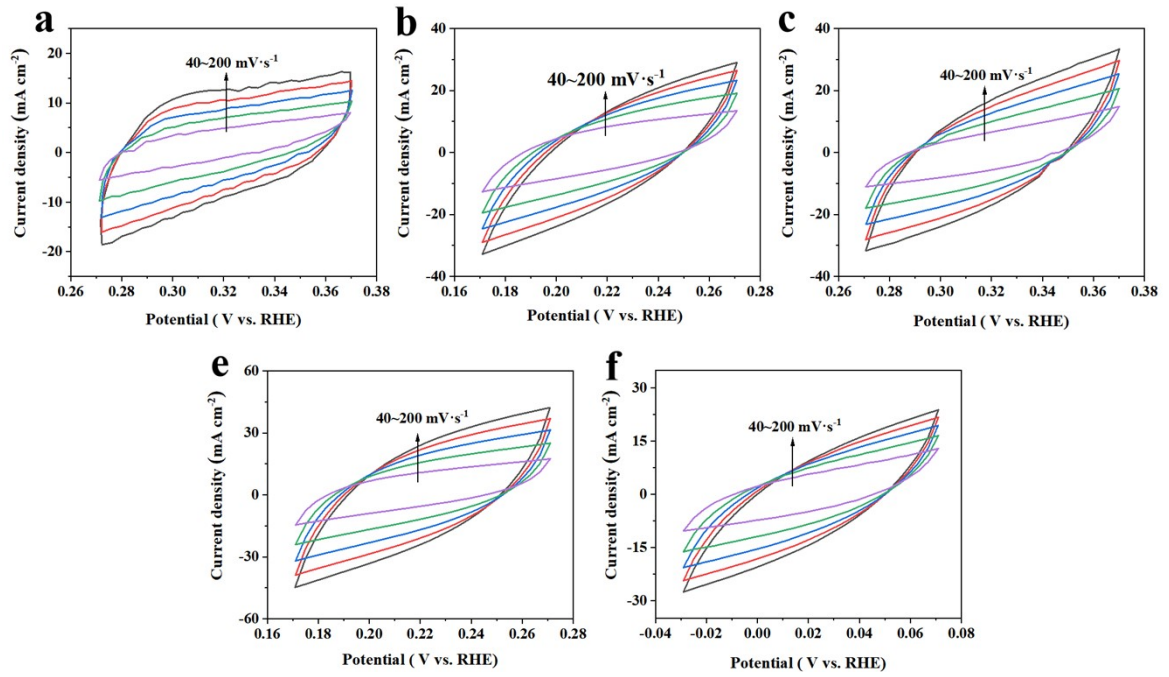

**Figure S21.** CV curves of the non-faradic region for (a) Ru-Ni<sub>2</sub>P@C, (b) Ru-Ni<sub>2</sub>P@CN-5, (c) Ru-Ni<sub>2</sub>P@CN-10, (d) Ru-Ni<sub>2</sub>P@CN, and (d) Ru-Ni<sub>2</sub>P@CN-20.

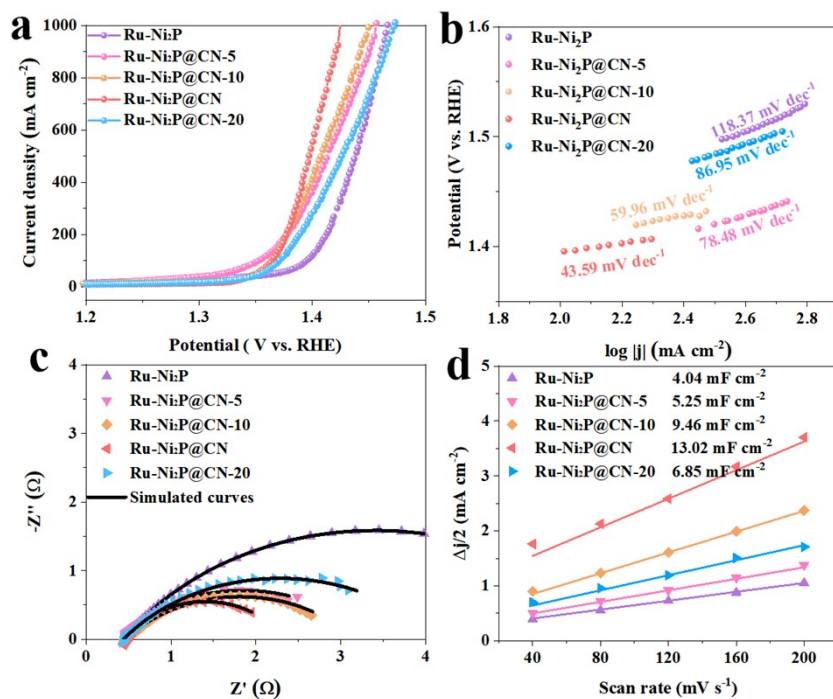

**Figure S22.** a) LSV curves of Ru-Ni<sub>2</sub>P, Ru-Ni<sub>2</sub>P@CN-5, Ru-Ni<sub>2</sub>P@CN-10, Ru-Ni<sub>2</sub>P@CN, and Ru-Ni<sub>2</sub>P@CN-20 in 1.0 M KOH. b) Tafel slopes. c) EIS charts d)  $C_{dl}$  plots of RuNi<sub>2</sub>P@C, Ru-Ni<sub>2</sub>P@CN-5, Ru-Ni<sub>2</sub>P@CN-10, Ru-Ni<sub>2</sub>P@CN, and Ru-Ni<sub>2</sub>P@CN-20.

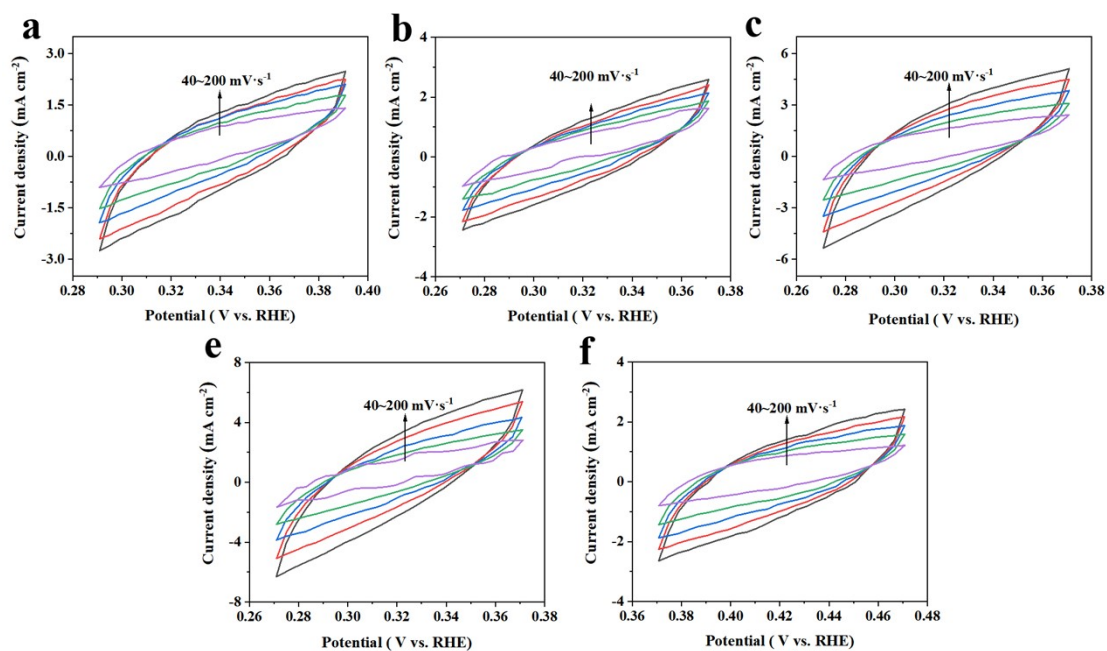

**Figure S23.** CV curves of the non-faradic region for (a) Ru-Ni<sub>2</sub>P@C, (b) Ru-Ni<sub>2</sub>P@CN-5, (c) Ru-Ni<sub>2</sub>P@CN-10, (d) Ru-Ni<sub>2</sub>P@CN, and (d) Ru-Ni<sub>2</sub>P@CN-20.



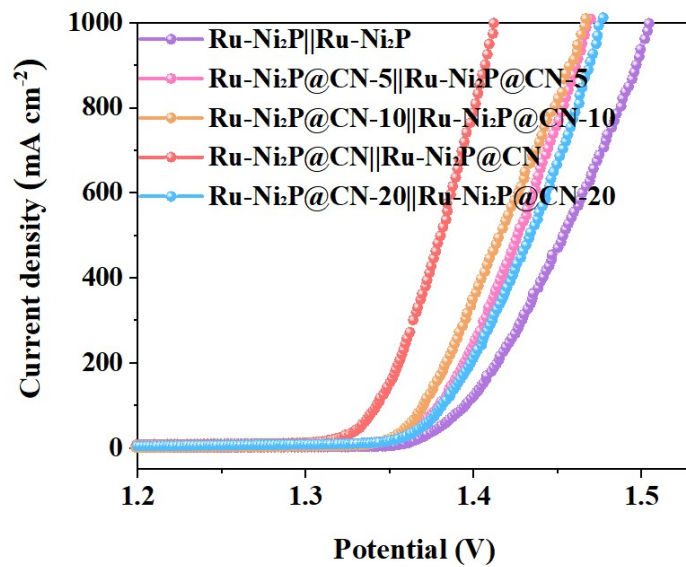

**Figure S24.** Electrocatalytic overall water splitting performance of Ru-Ni<sub>2</sub>P, Ru-Ni<sub>2</sub>P@CN-5, Ru-Ni<sub>2</sub>P@CN-10, Ru-Ni<sub>2</sub>P@CN, and Ru-Ni<sub>2</sub>P@CN-20 in 0.5 M urea solution.

**Table S1.** Comparison of Ru, Ni, P, N, and C contents in different electrocatalysts obtained from XPS tests.

| <b>Electrocatalysts/element(at%)</b> | <b>Ru</b> | <b>Ni</b> | <b>P</b> | <b>N</b> | <b>C</b> |
|--------------------------------------|-----------|-----------|----------|----------|----------|
| Ru-Ni <sub>2</sub> P@C               | 0.34      | 14.55     | 32.66    | 0        | 48.45    |
| Ru-Ni <sub>2</sub> P@CN              | 0.69      | 12.86     | 29.26    | 8.12     | 47.38    |

**Table S2.** Comparison of electrochemical surface area (ECSA) of Ru-Ni<sub>2</sub>P@CN catalyst and other comparative samples for HER.

| Electrocatalysts        | C <sub>dl</sub> (mF cm <sup>-2</sup> ) | C <sub>DL</sub> (mF) | ECSA (cm <sup>-2</sup> ) |
|-------------------------|----------------------------------------|----------------------|--------------------------|
| Ni <sub>2</sub> P@CN    | 17.9                                   | 17.9                 | 447.5                    |
| Ru-Ni <sub>2</sub> P    | 29.33                                  | 29.33                | 733.25                   |
| Ru-Ni <sub>2</sub> P@CN | 108.38                                 | 108.38               | 2709.5                   |
| Ru-Ni <sub>2</sub> P@C  | 74.28                                  | 74.28                | 1857                     |

$C_{DL}=C_{dl}*S$ ;  $S=1*1 \text{ cm}^2$ ;  $ECSA=C_{DL}/C_s$ ;  $C_s=0.04 \text{ mF cm}^{-2}$ .

**Table S3.** Internal resistance ( $R_{\Omega}$ ) and charge transfer resistance ( $R_{ct}$ ) of Ru-Ni<sub>2</sub>P@CN catalyst and other comparative samples for HER

| Electrocatalysts        | $R_{\Omega}(\Omega)$ | $R_{ct}(\Omega)$ |
|-------------------------|----------------------|------------------|
| Ni <sub>2</sub> P@CN    | 0.43                 | 18.16            |
| Ru-Ni <sub>2</sub> P    | 0.46                 | 12.89            |
| Ru-Ni <sub>2</sub> P@CN | 0.40                 | 0.66             |
| Ru-Ni <sub>2</sub> P@C  | 0.42                 | 2.93             |

**Table S4.** The overpotential required for excessive metal-based electrocatalysts was recently reported in an alkaline environment of 1000 mAcm<sup>-2</sup>.

| Catalyst                                                | HER<br>$\eta_{1000}$ (mV) | References |
|---------------------------------------------------------|---------------------------|------------|
| <b>this work</b>                                        | <b>255</b>                | □          |
| Ni/MoO <sub>2</sub> @CN                                 | 267                       | [1]        |
| Ni <sub>2</sub> (1-x)Mo <sub>2</sub> xP                 | 294                       | [2]        |
| Ni <sub>3</sub> P/MnOOH/NF                              | 268                       | [3]        |
| Ni <sub>2</sub> P/NF                                    | 306                       | [4]        |
| F, P-Fe <sub>3</sub> O <sub>4</sub> /IF                 | 321.3                     | [5]        |
| NiP <sub>2</sub> -FeP <sub>2</sub>                      | 327                       | [6]        |
| Ni <sub>2</sub> P-Fe <sub>2</sub> P/NF                  | 333                       | [7]        |
| FeWO <sub>4</sub> -Ni <sub>3</sub> S <sub>2</sub> @C/NF | 343                       | [8]        |
| A-NiCo LDH/NF                                           | 384                       | [9]        |
| Pt/C/NF                                                 | 431                       | [9]        |
| HC-Mo <sub>2</sub> S/Mo <sub>2</sub> C                  | 441                       | [10]       |
| Pd <sub>4</sub> S/Pd <sub>3</sub> P <sub>0.95</sub>     | 486                       | [11]       |

**Table S5.** ICP results of Ru before and after HER of Ru-Ni<sub>2</sub>P@CN

| <b>Sample</b> | <b>Ru content (at%)</b> |
|---------------|-------------------------|
| Initial       | 0.72                    |
| After-HER     | 0.70                    |

**Table S6.** Comparison of electrochemical surface area (ECSA) of N-Ru<sub>2</sub>P@Ru catalyst and other comparative samples for UOR.

| Electrocatalysts        | C <sub>dl</sub> (mF cm <sup>-2</sup> ) | C <sub>DL</sub> (mF) | ECSA (cm <sup>-2</sup> ) |
|-------------------------|----------------------------------------|----------------------|--------------------------|
| Ni <sub>2</sub> P@CN    | 175.81                                 | 175.81               | 4395.25                  |
| Ru-Ni <sub>2</sub> P    | 118.37                                 | 118.37               | 2959.25                  |
| Ru-Ni <sub>2</sub> P@CN | 43.59                                  | 43.59                | 1089.75                  |
| Ru-Ni <sub>2</sub> P@C  | 62.77                                  | 62.77                | 1569.25                  |

$C_{DL}=C_{dl}*S$ ;  $S=1*1 \text{ cm}^2$ ;  $ECSA=C_{DL}/C_s$ ;  $C_s=0.04 \text{ mF cm}^{-2}$ .

**Table S7.** Internal resistance ( $R_{\Omega}$ ) and charge transfer resistance ( $R_{ct}$ ) of Ru-  
Ni<sub>2</sub>P@CN catalyst and other comparative samples for UOR

| Electrocatalysts        | $R_{\Omega}(\Omega)$ | $R_{ct}(\Omega)$ |
|-------------------------|----------------------|------------------|
| Ni <sub>2</sub> P@CN    | 0.48                 | 13.48            |
| Ru-Ni <sub>2</sub> P    | 0.46                 | 5.58             |
| Ru-Ni <sub>2</sub> P@CN | 0.46                 | 1.76             |
| Ru-Ni <sub>2</sub> P@C  | 0.47                 | 4.14             |



**Table S8.** The potential required for a noble metal-based electrocatalyst in 0.5 M urea solution environment at 10 mA cm<sup>-2</sup> has recently been reported.

| Catalyst                               | The electrolyte       | Potential (V) | References |
|----------------------------------------|-----------------------|---------------|------------|
| this work                              | 1 M KOH+0.5M Urea     | 1.31          | □          |
| NiO/Ni <sub>2</sub> P/NF-40            | 1 M KOH+0.33 M Urea   | 1.338         | [12]       |
| Co <sub>2</sub> P/NiMoO <sub>4</sub>   | 1 M KOH+0.5M Urea     | 1.34          | [13]       |
| Ni-DMAP-2/NF                           | 1 M KOH+0.5 M Urea    | 1.34          | [14]       |
| MOF-Ni@MOF-Fe-S                        | 1 M KOH+0.33 M Urea   | 1.347         | [15]       |
| Ni <sub>2</sub> P/MoO <sub>2</sub> /NF | 1 M KOH+0.5 M Urea    | 1.35          | [16]       |
| Fc-NiCo-BDC                            | 1 M KOH+0.33 M Urea   | 1.35          | [17]       |
| P-Mo-Ni(OH) <sub>2</sub>               | 1.0 M KOH +0.1 M urea | 1.35          | [18]       |
| NiF <sub>3</sub> /Ni <sub>2</sub> P    | 1 M KOH+0.33 M Urea   | 1.36          | [19]       |
| Ni-MOF                                 | 1 M KOH+0.33 M Urea   | 1.37          | [20]       |
| Ni@NCNT                                | 1 M KOH+0.5 M Urea    | 1.38          | [21]       |
| MoP@NiCo-LDH/NF-20                     | 1 M KOH+0.5 M Urea    | 1.392         | [22]       |
| CoO-Co <sub>4</sub> N@NiFe-LDH         | 1 M KOH+0.33 M Urea   | 1.393         | [23]       |

**Table S9.** The potential required for a noble metal-based electrocatalyst in 0.5 M urea solution at 10 mA cm<sup>-2</sup> has recently been reported.

| Catalyst                                               | Pitential (V) | References |
|--------------------------------------------------------|---------------|------------|
| <b>this work</b>                                       | <b>1.313</b>  | □          |
| Ru-Ni <sub>3</sub> N@NC                                | 1.36          | [24]       |
| Ni(OH)S/NF                                             | 1.36          | [25]       |
| NiSe <sub>2</sub> -NiMoO <sub>4</sub>                  | 1.37          | [26]       |
| NiS@Ni <sub>3</sub> S <sub>2</sub> /NiMoO <sub>4</sub> | 1.4           | [27]       |
| P-CoNi <sub>2</sub> S <sub>4</sub>                     | 1.4           | [28]       |
| Ni-Mo nanotube                                         | 1.43          | [29]       |
| NiCo <sub>2</sub> S <sub>4</sub>                       | 1.45          | [30]       |
| Ni-S-Se/NF                                             | 1.47          | [31]       |
| Ni <sub>2</sub> P/Fe <sub>2</sub> P/NF                 | 1.47          | [32]       |
| Ni <sub>2</sub> P/CFC                                  | 1.48          | [33]       |
| Ni(OH) <sub>2</sub> -PBA-P                             | 1.5           | [34]       |
| NiF <sub>3</sub> /Ni <sub>2</sub> P@CC-2               | 1.54          | [35]       |

**Table S10.** Internal resistance ( $R_{\Omega}$ ) and charge transfer resistance ( $R_{ct}$ ) of Ru-Ni<sub>2</sub>P@CN catalyst and other comparative samples for HER

| Electrocatalysts           | $R_{\Omega}(\Omega)$ | $R_{ct}(\Omega)$ |
|----------------------------|----------------------|------------------|
| Ru-Ni <sub>2</sub> P       | 0.46                 | 12.89            |
| Ru-Ni <sub>2</sub> P@CN-5  | 0.46                 | 1.40             |
| Ru-Ni <sub>2</sub> P@CN-10 | 0.44                 | 0.82             |
| Ru-Ni <sub>2</sub> P@CN    | 0.40                 | 0.66             |
| Ru-Ni <sub>2</sub> P@CN-20 | 0.42                 | 2.13             |

**Table S11** Internal resistance ( $R_{\Omega}$ ) and charge transfer resistance ( $R_{ct}$ ) of Ru-Ni<sub>2</sub>P@CN catalyst and other comparative samples for UOR

| Electrocatalysts           | $R_{\Omega}(\Omega)$ | $R_{ct}(\Omega)$ |
|----------------------------|----------------------|------------------|
| Ru-Ni <sub>2</sub> P       | 0.46                 | 5.58             |
| Ru-Ni <sub>2</sub> P@CN-5  | 0.46                 | 2.58             |
| Ru-Ni <sub>2</sub> P@CN-10 | 0.47                 | 2.47             |
| Ru-Ni <sub>2</sub> P@CN    | 0.46                 | 1.76             |
| Ru-Ni <sub>2</sub> P@CN-20 | 0.48                 | 3.31             |

## References

1. G. F. Qian, J. L. Chen, T. Q. Yu, J. C. Liu, L. Luo and S. B. Yin, *Nano-Micro Lett.*, 2022, **14**, 1-15.
2. F. Yu, H. Q. Zhou, Y. F. Huang, J. Y. Sun, F. Qin, J. M. Bao, W. A. Goddard, S. Chen and Z. F. Ren, *Nat. Commun.*, 2018, **9**, 2551.
3. L. Yu, I. K. Mishra, Y. L. Xie, H. Q. Zhou, J. Y. Sun, J. Q. Zhou, Y. Z. Ni, D. Luo, F. Yu, Y. Yu, S. Chen and Z. F. Ren, *Nano Energy*, 2018, **53**, 492-500.
4. X. Y. Zhang, F. T. Li, R. Y. Fan, J. Zhao, B. Dong, F. L. Wang, H. J. Liu, J. F. Yu, C. G. Liu and Y. M. Chai, *J. Mater. Chem. A*, 2021, **21**, 15836-15845.
5. A. Kumar, V. Q. Bui, J. S. Lee, A. R. Jadhav, Y. Hwang, M. Gyu Kim, Y. Kawazoe, H. Lee. *ACS Energy Lett.* 2021, **6**, 354-363.
6. X. X. Yu, Z. Y. Yu, X. L. Zhang, Y. R. Zheng, Y. Duan, Q. Gao, R. Wu, B. Sun, M. R. Gao, G. X. Wang and S. H. Yu, *J. Am. Chem. Soc.*, 2019, **141**, 7537-7543.
7. H. H. Tang, Y. F. Qi, D. N. Feng, Y. Y. Chen, L. Y. Liu, L. Hao, K. F. Yue, D. S. Li and Y. Y. Wang, *Sustain. Energy Fuels*, 2022, **19**, 4477-4483.
8. Z. L. Wang, G. F. Qian, T. Q. Yu, J. L. Chen, F. Shen, L. Luo, Y. J. Zou and S. B. Yin, *Chem. Eng. J.*, 2022, **434**, 134669.
9. H. Y. Yang, Z. L. Chen, P. F. Guo, B. Fei, R. B. Wu, *Appl. Catal. B Environ.*, 2020, **261**, 118240.
10. C. Zhang, Y. T. Luo, J. Y. Tan, Q. M. Yu, F. N. Yang, Z. Y. Zhang, L. S. Yang, H. M. Cheng and B. L. Liu, *Nat. Commun.*, 2020, **11**, 3724.
11. G. F. Zhang, A. H. Wang, L. W. Niu, W. Gao, W. Hu, Z. H. Liu, R. M. Wang and J. B. Chen, *Adv. Energy Mater.*, 2022, **11**, 2103511.
12. X. Xu, S. J. H. Wang, X. Y. Wang, V. Linkov and R. F. Wang, *J. Colloid Interf. Sci.*, 2022, 615, 163-172.
13. M. Z. You, S. S. Yi, G. X. Zhang, W. M. Long and D. L. Chen, *J. Colloid Interface Sci.*, 2023, **5**, 184.
14. H. Jiang, S. Y. Bu, Q. L. Gao, J. Long, P. F. Wang, C. S. Lee and W. J. Zhang, *Mater. Today Energy*, 2022, **27**, 101024.

15. H. Z. Xu, K. Ye, K. Zhu, J. L. Yin, J. Yan, G. L. Wang and D. X. Cao, *Dalton Trans.*, 2020, **49**, 5646-5652.
16. X. Xu, S. Ji, H. Wang, X. Y. Wang, V. Linkov and R. F. Wang, *J. Colloid Interf. Sci.*, 2022, **615**, 163-172.
17. M. Li, H. C. Sun, J. M. Yang, M. Humayun, L. F. Li, X. F. Xu, X. Y. Xue, A. Habibi-Yangjeh, K. Temst and C. D. Wang, *Chem. Eng. J.*, 2022, **430**, 132733.
18. W. H. Zhang, Y. H. Tang, L. M. Yu and X. Y. Yu, *Appl. Catal. B Environ.*, 2020, **260**, 118154.
19. K. L. Wang, W. Huang, Q. H. Cao, Y. J. Zhao, X. J. Sun, R. Ding, W. W. Lin, E. H. Liu and P. Gao, *Chem. Eng. J.*, 2022, **427**, 130865.
20. D. D. Zhu, C. X. Guo, J. L. Liu, L. Wang, Y. Du and S. Z. Qiao, *Chem. Commun.*, 2017, **53**, 10906-10909.
21. Q. Zhang, F. MD. Kazim, S. X. Ma, K. G. Qu, M. Li, Y. G. Wang, H. Hu, W. W. Cai and Z. H. Yang, *Appl. Catal. B Environ*, 2021, **280**, 119436.
22. T. Wang, H. M. Wu, C. Q. Feng, L. Zhang and J. J. Zhang, *J. Mater. Chem. A*, 2020, **8**, 18106-18116.
23. B. J. Chen, M. Humayun, Y. D. Li, H. M. Zhang, H. C. Sun, Y. Wu and C. D. Wang, *ACS Sustain. Chem. Eng.*, 2021, **9**, 14180-14192.
24. Y. B. Liu, D. B. Zheng, Y. Zhao, P. Shen, Y. X. Du, W. P. Xiao, Y. M. Du, Y. L. Fu, Z. X. Wu and L. Wang, *Int. J. Hydrogen Energy*, 2022, **47**, 25081-25089.
25. X. Jia, H. J. Kang, X. X. Yang, Y. L. Li, K. Cui, X. H. Wu, W. Qin and G. Wu, *Appl. Catal. B: Environ.*, 2022, **312**, 121389.
26. T. Q. Yu, Q. L. Xu, J. L. Chen, G. F. Qian, X. Y. Zhuo, H. F. Yang and S. B. Yin, *Chem. Eng. J.*, 2022, **449**, 137791.
27. L. Sha, T. Liu, K. Ye, K. Zhu, J. Yan, J. Yin, G. Wang, D. Cao, *J. Mater.s Chem. A*, 2020, **8**, 18055-18063.
28. X. F. Lu, S. L. Zhang, W. Sim, S. Y. Gao, X. W. David Lou, *Angew. Chem. Int. Ed.*, 2021, **60**, 22885.
29. J. Y. Zhang, T. He, M. D. Wang, R. J. Qi, Y. Yan, Z. H. Dong, H. F. Liu, H. M. Wang and B. Y. Xia, *Nano Energy*, 2019, **60**, 894-902.

30. J. Wang, Y. Sun, Y. F. Qi and C. Wang, *ACS Appl. Mater. Interfaces*, 2021, **13**, 57392-57402.
31. N. Chen, Y. X. Du, G. Zhang, W. T. Lu and F. F. Cao, *Nano Energy*, 2021, **81**, 105605.
32. L. Yan, Y. L. Sun, E. L. Hu, J. Q. Ning, Y. J. Zhong, Z. Y. Zhang and Y. Hu, *J. Colloid Interface Sci.*, 2019, **541**: 279-286.
33. X. Zhang, M. M. Han, G. Q. Liu, G. Z. Wang, Y. X. Zhang, H. M. Zhang and H. J. Zhao, *Appl. Catal. B: Environ.*, **2019**, 244 , 899-908.
34. H. Z. Xu, K. Ye, K. Zhu, Y. Y. Gao, J. L. Yin, J. Yan, G. L. Wang, D. X. Cao, *ACS Sustain. Chem. Eng.*, 2020, **8**, 16037.
35. K. L. Wang, W. Huang, Q. H. Cao, Y. J. Zhao, X. J. Sun, R. Ding, W. W. Lin, E. H. Liu and P. Gao, *Chem. Eng. J.*, 2022, **427**, 130865.
